# Supplementary material for: Ethical Decision-Making and Institutional Support for ECMO and Ventilator Allocation During the COVID-19 Pandemic: A Nationwide Cross-Sectional Survey of Designated Physicians at Japan’s Advanced Critical Care Centers
Source: Research Square preprint supplement (doi:10.21203/rs.3.rs-7126171/v1), 2025-08-13
Supplement: Supplementary file 1 [file 63f11dd5bc1b50cc0031f029.docx]

**Survey on ECMO and Ventilator Allocation and Ethical Decision-Making During the COVID-19 Pandemic**

**Section 1: ECMO Decision-Making**

Q1. Was ECMO used at your institution prior to the COVID-19 pandemic?

□ Yes  □ No

Q2. During the pandemic, did your institution experience the following ECMO-related shortages? (Please answer Yes or No for each item)

a. ECMO could not be offered to patients who might have survived, due to equipment shortage

□ Yes  □ No

b. ECMO unavailability was used as a condition for admission or ICU entry

□ Yes  □ No

Q3. During the pandemic, did your institution make decisions regarding the redistribution or early withdrawal of ECMO? (Please answer Yes or No for each item)

a. ECMO was withdrawn from patients with low survival probability and reallocated to others

□ Yes  □ No

b. ECMO was terminated earlier than medically desirable due to pandemic constraints

□ Yes  □ No

c. ECMO was withdrawn from end-of-life patients earlier than before the pandemic

□ Yes  □ No

Q4. Compared to the pre-pandemic period, did your institution limit ECMO indications during the pandemic?

□ Yes  □ No

Q5. If Yes, please indicate the criteria used (select all that apply):

a. Age (e.g., giving priority to younger patients)

b. Prognosis (e.g., patients with higher survival probability)

c. Severity of illness

d. Order of arrival

e. Social background (e.g., occupation, family role)

f. Strength of patient or family wishes

g. Other (please specify):

Q6. Did you refrain from using ECMO in some cases to preserve resources for non-COVID-19 patients?

□ Yes  □ No

Q7. If Yes, what were the reasons? (select all that apply):

a. Higher survival rate in non-COVID-19 cases

b. To ensure availability for cardiovascular surgery or other critical conditions

c. To reserve ECMO for more suitable COVID-19 cases

d. Other (please specify):

**Section 2: Ventilator Decision-Making**

Q8. During the pandemic, did your institution experience the following ventilator-related shortages? (Please answer Yes or No for each item)

a. Ventilators could not be offered to patients who might have survived

□ Yes  □ No

b. Ventilator unavailability was used as a condition for admission or ICU entry

□ Yes  □ No

Q9. During the pandemic, did your institution make decisions regarding the redistribution or early withdrawal of ventilators? (Please answer Yes or No for each item)

a. Ventilators were withdrawn from patients with low survival probability and reallocated to others

□ Yes  □ No

b. Ventilators were terminated earlier than medically desirable due to pandemic constraints

□ Yes  □ No

c. Ventilator treatment was withdrawn earlier from end-of-life patients than before the pandemic

□ Yes  □ No

Q10. Compared to the pre-pandemic period, did your institution limit ventilator indications during the pandemic?

□ Yes  □ No

Q11. If Yes, please indicate the criteria used (select all that apply):

a. Age

b. Prognosis

c. Severity of illness

d. Order of arrival

e. Social background

f. Strength of patient or family wishes

g. Other (please specify):

**Section 3: Institutional Policies and Guidelines**

Q12. Did your institution establish its own internal rules regarding the allocation of ECMO or ventilators during the pandemic?

□ Yes  □ No

Q13. If Yes, which external guidelines were referenced? (select all that apply):

a. Ministry of Health, Labour and Welfare (MHLW) “COVID-19 Clinical Practice Guide”

b. Japan Association for Bioethics proposal on ventilator allocation

c. Japanese Society of Intensive Care Medicine position statement

d. New York State Ventilator Allocation Guidelines

e. Japanese Society for Respiratory Care Medicine: ECMO/Ventilator Guidelines

f. Other (please specify):

**Section 4: Ethical Judgments and Psychological Burden**

Q14. Which ethical value did you prioritize most when making decisions about ECMO or ventilator use? (select only one)

a. Fairness (avoiding inequity between patients)

b. Efficiency (saving the greatest number of lives)

c. Respect for autonomy (honoring patient wishes)

Q15. Compared to usual clinical decisions, did you experience greater psychological burden when making triage decisions during the pandemic?

□ Yes  □ No

Q16. Did you use any institutional ethics support (for example, ethics consultation or committee advice) when making these decisions?

□ Yes  □ No
