# Supplementary material for: Ethical Decision-Making and Institutional Support for ECMO and Ventilator Allocation During the COVID-19 Pandemic: A Nationwide Cross-Sectional Survey of Designated Physicians at Japan’s Advanced Critical Care Centers
Source: Research Square preprint supplement (doi:10.21203/rs.3.rs-7126171/v1), 2025-08-13
Supplement: Supplementary file 2 [file 7c64203a6d29deec583c8d0c.xlsx]

## Sheet: Sheet1
Q1: Was ECMO used at your institution prior to the COVID-19 pandemic? (Yes=1, No=0)	Q2a: ECMO could not be offered to patients who might have survived, due to equipment shortage? (Yes=1, No=0)	Q2b: ECMO unavailability was used as a condition for admission or ICU entry? (Yes=1, No=0)	Q3a: ECMO withdrawn from patients with low survival probability and reallocated to others? (Yes=1, No=0)	Q3b: ECMO was terminated earlier than medically desirable due to pandemic constraints? (Yes=1, No=0)	Q3c: ECMO was withdrawn from end-of-life patients earlier than before the pandemic? (Yes=1, No=0)	Q4: Compared to the pre-pandemic period, did your institution limit ECMO indications during the pandemic? (Yes=1, No=0)	Q5a: Age was used to limit ECMO indications? (Yes=1, No=0)	Q5b: Prognosis was used to limit ECMO indications? (Yes=1, No=0)	Q5c: Severity of illness was used to limit ECMO indications? (Yes=1, No=0)	Q5d: Order of arrival was used to limit ECMO indications? (Yes=1, No=0)	Q5e: Social background was used to limit ECMO indications? (Yes=1, No=0)	Q5f: Strength of patient or family wishes was used to limit ECMO indications? (Yes=1, No=0)	Q6: Did you refrain from using ECMO to preserve resources for non-COVID-19 patients? (Yes=1, No=0)	Q7a: Higher survival rate in non-COVID-19 cases was a reason for refraining ECMO? (Yes=1, No=0)	Q7b: To ensure availability for cardiovascular surgery? (Yes=1, No=0)	Q7c: To reserve ECMO for more suitable COVID-19 cases? (Yes=1, No=0)	Q8a: Ventilators could not be offered to patients who might have survived? (Yes=1, No=0)	Q8b: Ventilator unavailability was used as a condition for admission or ICU entry? (Yes=1, No=0)	Q9a: Ventilators were withdrawn from patients with low survival probability and reallocated to others? (Yes=1, No=0)	Q9b: Ventilators were terminated earlier than medically desirable due to pandemic constraints? (Yes=1, No=0)	Q9c: Ventilator treatment was withdrawn earlier from end-of-life patients than before the pandemic? (Yes=1, No=0)	Q10: Compared to the pre-pandemic period, did your institution limit ventilator indications during the pandemic? (Yes=1, No=0)	Q11a: Age was used to limit ventilator indications? (Yes=1, No=0)	Q11b: Prognosis was used to limit ventilator indications? (Yes=1, No=0)	Q11c: Severity of illness was used to limit ventilator indications? (Yes=1, No=0)	Q11d: Order of arrival was used to limit ventilator indications? (Yes=1, No=0)	Q11e: Social background was used to limit ventilator indications? (Yes=1, No=0)	Q11f: Strength of patient or family wishes was used to limit ventilator indications? (Yes=1, No=0)	Q12: Did your institution establish its own internal rules regarding the allocation of ECMO or ventilators? (Yes=1, No=0)	Q13a: Referred to MHLW COVID-19 Clinical Practice Guide? (Yes=1, No=0)	Q13b: Referred to Japan Association for Bioethics proposal? (Yes=1, No=0)	Q13c: Referred to Japanese Society of Intensive Care Medicine position statement? (Yes=1, No=0)	Q13d: Referred to NY State Ventilator Allocation Guidelines? (Yes=1, No=0)	Q13e: Referred to Japanese Society for Respiratory Care Medicine guidelines? (Yes=1, No=0)	Q14a: Fairness was the most prioritized ethical value? (Yes=1, No=0)	Q14b: Efficiency was the most prioritized ethical value? (Yes=1, No=0)	Q14c: Respect for autonomy was the most prioritized ethical value? (Yes=1, No=0)	Q15: Compared to usual decisions, did you experience greater psychological burden? (Yes=1, No=0)	Q16: Did you use any institutional ethics support when making decisions? (Yes=1, No=0)
1	0	0	0	0	0	0	0	0	0	0	0	0	0	0	0	0	0	0	0	0	0	0	0	0	0	0	0	0	1	1	1	1	0	1	1	0	0	0	0
1	0	0	0	0	0	1	0	0	0	0	0	0	0	0	0	0	0	1	0	0	1	1	1	0	1	0	0	0	1	1	0	1	0	1	0	0	1	1	0
1	0	0	0	0	0	1	1	0	0	0	0	0	0	0	0	0	0	0	0	0	0	0	0	0	0	0	0	0	0	0	0	0	0	0	1	0	0	0	0
1	0	0	0	0	0	1	1	0	0	0	0	0	0	0	0	0	0	0	0	0	0	0	0	0	0	0	0	0	1	1	0	0	0	0				1	0
1	0	0	0	0	0	0	0	0	0	0	0	0	0	0	0	0	0	0	0	0	0	0	0	0	0	0	0	0	0	0	0	0	0	0	0	0	1	0	0
1	0	0	0	0	0	1	1	1	0	0	0	0	0	0	0	0	0	0	0	0	0	0	0	0	0	0	0	0	1	0	0	0	0	0				0	0
1	1	1	0	0	1	1	1	1	0	0	1	1	1	1	1	1	0	0	0	0	0	0	0	0	0	0	0	0	1	1	1	1	0	1	0	1	0	1	0
1	0	0	0	0	0	0	0	0	0	0	0	0	0	0	0	0	0	0	0	0	0	0	0	0	0	0	0	0	0	0	0	0	0	0	0	1	0	1	0
1	0	0	0	0	0	0	0	0	0	0	0	0	0	0	0	0	0	0	0	0	0	0	0	0	0	0	0	0	0	0	0	0	0	0	0	0	1	0	1
1	0	0	0	0	0	0	0	0	0	0	0	0	0	0	0	0	0	0	0	0	0	0	0	0	0	0	0	0	0	0	0	0	0	0	1	0	0	1	1
1	0	0	0	0	0	1	0	0	1	0	0	0	0	0	0	0	0	0	0	0	0	0	0	0	0	0	0	0	0	0	0	0	0	0	0	1	0	1	0
1	0	0	0	0	0	0	0	0	0	0	0	0	0	0	0	0	0	0	0	0	0	0	0	0	0	0	0	0	0	0	0	0	0	0	0	1	0	0	0
1	0	0	0	0	0	0	0	0	0	0	0	0	0	0	0	0	0	0	0	0	0	0	0	0	0	0	0	0	0	0	0	0	0	0				0	0
1	0	0	1	0	0	0	0	0	0	0	0	0	0	0	0	0	0	0	0	0	0	0	0	0	0	0	0	0	0	0	0	0	0	0	0	0	1	0	0
1	0	0	0	0	0	0	0	0	0	0	0	0	0	0	0	0	0	0	0	0	0	0	0	0	0	0	0	0	0	0	0	0	0	0	0	0	1	1	0
1	0	0	0	0	1	0	0	0	0	0	0	0	0	0	0	0	0	0	0	0	1	0	0	0	0	0	0	0	1	1	0	1	0	0	0	1	0	0	0
1	1	0	0	0	0	0	0	0	0	0	0	0	0	0	0	0	0	0	0	0	0	0	0	0	0	0	0	0	1	1	0	1	0	0	0	1	0	1	0
1	0	0	0	0	0	0	0	0	0	0	0	0	0	0	0	0	0	0	0	0	0	0	0	0	0	0	0	0	0	0	0	0	0	0	0	1	0	1	1
1	0	1	0	0	0	1	1	1	1	0	1	0	1	0	0	0	0	0	0	0	0	1	1	1	1	0	1	0	1	1	0	0	0	1	0	1	0	1	1
1	0	0	0	0	0	0	0	0	0	0	0	0	0	0	0	0	0	0	0	0	0	0	0	0	0	0	0	0	0	0	0	0	0	0	0	1	0	1	0
1	0	0	0	0	1	1	1	1	1	0	1	0	0	0	0	0	0	0	0	0	0	1	1	0	0	0	1	0	1	1	0	0	0	0				1	0
1	1	1	0	0	1	0	0	0	0	0	0	0	0	0	0	0	0	0	0	0	1	0	0	0	0	0	0	0	0	0	0	0	0	0	1	0	0	0	0
1	0	0	0	0	0	0	0	0	0	0	0	0	0	0	0	0	0	0	0	0	0	0	0	0	0	0	0	0	0	0	0	0	0	0	0	1	0	0	0
0	0	1	0	0	0	0	0	0	0	0	0	0	0	0	0	0	0	1	0	0	0	0	0	0	0	0	0	0	0	0	0	0	0	0	0	1	0	0	0
1	0	0	0	0	0	0	0	0	0	0	0	0	0	0	0	0	0	0	0	0	0	0	0	0	0	0	0	0	0	0	0	0	0	0	0	1	0	0	0
1	0	1	0	0	0	1	1	1	1	1	0	0	1	0	1	1	0	1	0	1	0	1	1	0	1	1	0	0	1	1	0	1	0	0	1	0	0	1	1
1	0	0	0	0	1	1	1	1	1	0	0	0	1	1	1	0	0	0	0	0	1	1	1	1	1	0	0	0	0	0	0	0	0	0	0	1	0	0	0
